# Supplementary material for: Potential risk groups and psychological, psychosocial, and health behavioral predictors of pharmacological neuroenhancement among university students in Germany
Source: PubMed Central journal article supplement (PMC8766436; doi:10.1038/s41598-022-04891-y), 2022-01-18
Supplement: 41598_2022_4891_MOESM1_ESM.pdf [file 41598_2022_4891_MOESM1_ESM.pdf]

**Potential risk groups and psychological, psychosocial, and health  
behavioral predictors of pharmacological neuroenhancement among  
university students in Germany**

**Sebastian Heller<sup>1</sup>, Ana Nanette Tibubos<sup>2</sup>, Thilo A. Hoff<sup>1</sup>, Antonia M. Werner<sup>3</sup>, Jennifer  
L. Reichel<sup>1</sup>, Lina M. Mülder<sup>4</sup>, Markus Schäfer<sup>5</sup>, Daniel Pfirrmann<sup>6</sup>, Birgit Stark<sup>5</sup>,  
Thomas Rigotti<sup>4</sup>, Perikles Simon<sup>6</sup>, Manfred E. Beutel<sup>3</sup>, Stephan Letzel<sup>1</sup>, Pavel Dietz<sup>1\*</sup>**

<sup>1</sup>Institute of Occupational, Social and Environmental Medicine, University Medical Center of the University of Mainz, Germany

<sup>2</sup>Diagnostics in Healthcare and E-Health, University of Trier, Germany

<sup>3</sup>Department of Psychosomatic Medicine and Psychotherapy, University Medical Center of the University of Mainz, Germany

<sup>4</sup>Department of Work, Organizational, and Business Psychology, Institute for Psychology, Johannes Gutenberg University Mainz, Germany

<sup>5</sup>Department of Communication, Johannes Gutenberg University Mainz, Germany

<sup>6</sup>Department of Sports Medicine, Rehabilitation and Disease Prevention, Institute of Sport Science, Johannes Gutenberg University Mainz, Germany

\*corresponding author

Mail: pdietz@uni-mainz.de

Phone: +49 (0)6131 17 – 9339

| Dimension                         | Variable (count)                    | Scale and/or Reference | Items                                                                                                        | 'Questions of self-constructed items', <i>answering options</i>                                                                                                         |
|-----------------------------------|-------------------------------------|------------------------|--------------------------------------------------------------------------------------------------------------|-------------------------------------------------------------------------------------------------------------------------------------------------------------------------|
| Sociodemographic variables        | Gender (1)                          |                        | 1                                                                                                            | 'Your gender:' <i>male (1) / female (2) / diverse (3)</i>                                                                                                               |
|                                   | Degree (1)                          |                        | 1                                                                                                            | 'Which degree do you pursue with your current study?' <i>Drop-down list of all degrees at the university of Mainz</i>                                                   |
|                                   | Age (1)                             |                        | 1                                                                                                            | 'Your age in years:'                                                                                                                                                    |
|                                   | Relationship status (1)             |                        | 1                                                                                                            | 'What is your relationship status?' <i>Single (1) / Partnership in one household (2) / Partnership with separate living conditions (3)</i>                              |
|                                   | Financial status (1)                |                        | 1                                                                                                            | 'What is the amount of money you monthly have at your disposal in average?'                                                                                             |
|                                   | Employment (1)                      | Self-constructed items | 1                                                                                                            | 'Are you currently employed?' <i>No (1) / Yes, full-time (2) / Yes, regularly part-time (3) / Yes, marginally or irregularly employed (4)</i>                           |
|                                   | Support by parents/relatives (1)    |                        | 1                                                                                                            | 'How do you finance your study?' <i>Support by parents or relatives: Yes / No</i>                                                                                       |
|                                   | Parents' educational background (1) |                        | 1                                                                                                            | 'Please select the highest educational attainment of your mother or your father (the highest of both):' <i>List of attainments, also including , 'other attainment'</i> |
|                                   | Migration background (1)            |                        | 1                                                                                                            | 'Are both of your parents born in the today's area of Germany?' <i>Yes (1) / No (2) / Don't know (3) / No information (4)</i>                                           |
| Personal migration experience (1) |                                     | 1                      | 'Are you born in the today's area of Germany?' <i>Yes (1) / No (2) / Don't know (3) / No information (4)</i> |                                                                                                                                                                         |
|                                   |                                     |                        | 1                                                                                                            |                                                                                                                                                                         |

|                                             |                                                                 |                                                                |   |                                                                                                                                                        |
|---------------------------------------------|-----------------------------------------------------------------|----------------------------------------------------------------|---|--------------------------------------------------------------------------------------------------------------------------------------------------------|
|                                             | Semester hours and Semester hours with mandatory attendance (2) |                                                                | 2 | ‘How many semester hours per week do you take this semester? Thereof, how many with obligation to attend?’                                             |
|                                             | Field of study (1)                                              |                                                                | 1 | Grouped variable created of: ‘What is your current study-subject or special-subject?’ <i>Drop-down list of all subjects of the university of Mainz</i> |
|                                             | First year (Semester/Study progress) (1)                        |                                                                | 1 | ‘What is the number of your current university semester?’                                                                                              |
| <b>Psychological variables</b>              | Somatic symptoms (1)                                            | SSS-8 <sup>1</sup>                                             | 8 |                                                                                                                                                        |
|                                             | Depressive symptoms (1)                                         | PHQ-9 <sup>2</sup>                                             | 9 |                                                                                                                                                        |
|                                             | Symptoms of general anxiety (1)                                 | GAD-2 <sup>3</sup>                                             | 2 |                                                                                                                                                        |
|                                             | Loneliness (1)                                                  | UCLA <sup>3</sup>                                              | 3 |                                                                                                                                                        |
|                                             | Emotional Exhaustion (1)                                        | MBI-SS <sup>4</sup>                                            | 5 |                                                                                                                                                        |
|                                             | Social Anxiety (1)                                              | Mini-SPIN <sup>5</sup>                                         | 3 |                                                                                                                                                        |
| <b>Study-related psychosocial variables</b> | Presenteeism (1)                                                | Töpritz et al. <sup>6</sup>                                    | 1 |                                                                                                                                                        |
|                                             | Absenteeism (1)                                                 | Töpritz et al. <sup>6</sup>                                    | 1 |                                                                                                                                                        |
|                                             | Planning competence and Competence for self-motivation (2)      | Dettmers & Clauß <sup>7</sup>                                  | 8 |                                                                                                                                                        |
|                                             | Excessive demand (qualitative) (1)                              | BARI-S <sup>8</sup>                                            | 2 |                                                                                                                                                        |
|                                             | Competition (1)                                                 | Fend <sup>9</sup>                                              | 4 |                                                                                                                                                        |
|                                             | Cognitive irritation (1)                                        | Mohr et al. <sup>10</sup>                                      |   |                                                                                                                                                        |
|                                             | Self-efficacy expectancy (1)                                    | Self-Efficacy Scale; Adapted from Rigotti et al. <sup>11</sup> | 6 |                                                                                                                                                        |
|                                             | Procrastination (1)                                             | GPS-K <sup>12</sup>                                            | 9 |                                                                                                                                                        |
|                                             | Self-endangering behavior (1)                                   | Krause et al. <sup>13</sup>                                    | 4 |                                                                                                                                                        |
|                                             | Performance pressure (1)                                        | Fend <sup>9</sup>                                              | 5 |                                                                                                                                                        |
|                                             | Self-perceived Employability (1)                                | Self-constructed                                               | 1 |                                                                                                                                                        |
|                                             | Autonomy (1)                                                    | BARI-S <sup>8</sup>                                            | 6 |                                                                                                                                                        |

|                                               |                                                                                   |                                                                        |   |                                                                                                                                                                                                                                                                                                                                                                                                                     |
|-----------------------------------------------|-----------------------------------------------------------------------------------|------------------------------------------------------------------------|---|---------------------------------------------------------------------------------------------------------------------------------------------------------------------------------------------------------------------------------------------------------------------------------------------------------------------------------------------------------------------------------------------------------------------|
|                                               | Coping via use of:<br>configuration options<br>and<br>social support (2)          | In style of Daniels et al. <sup>14</sup>                               | 4 |                                                                                                                                                                                                                                                                                                                                                                                                                     |
|                                               | Social support of:<br>fellow students and<br>lecturers (2)                        | SALSA <sup>15</sup>                                                    | 3 |                                                                                                                                                                                                                                                                                                                                                                                                                     |
| <b>General<br/>psychosocial<br/>variables</b> | Self-criticism (1)                                                                | DEQ-SC4 <sup>16</sup> ; Tibubos et<br>al. <sup>17</sup>                | 4 |                                                                                                                                                                                                                                                                                                                                                                                                                     |
|                                               | Self-acceptance (1)                                                               | Ryff <sup>18</sup> ; Ryff & Keyes <sup>19</sup>                        | 3 |                                                                                                                                                                                                                                                                                                                                                                                                                     |
|                                               | Emotion regulation,<br>emotion suppression,<br>and impulsiveness (3)              | ERQ <sup>20</sup>                                                      | 4 |                                                                                                                                                                                                                                                                                                                                                                                                                     |
| <b>Health behavior<br/>variables</b>          | Healthy diet (1)                                                                  | Self-constructed                                                       | 1 | ‘Healthy diet consists of eating<br>plentiful whole grains, potatoes,<br>fruit and vegetable several times a<br>day, food low in trans fats, little red<br>meat and sausage, little fast-food<br>(e.g. burger, fries), little sugar-rich<br>food (e.g. lemonade, soft drinks,<br>candy, cake). To what extent did<br>you stick to a healthy diet in the last<br>month?’ <i>Not at all (1) – Very strong<br/>(5)</i> |
|                                               | Moderate-vigorous<br>physical activity<br>(min/day) and<br>Sedentary Behavior (2) | IPAQ short version <sup>21</sup>                                       | 7 |                                                                                                                                                                                                                                                                                                                                                                                                                     |
|                                               | Alcohol use (1)                                                                   | AUDIT-C (Cut-Off: 4) <sup>22</sup>                                     | 3 |                                                                                                                                                                                                                                                                                                                                                                                                                     |
|                                               | Smoking cigarettes (1)                                                            | Töpritz et al. <sup>6</sup>                                            | 1 |                                                                                                                                                                                                                                                                                                                                                                                                                     |
|                                               | Coffee, Energy drinks,<br>Caffeine tablets, Cola,<br>Ginkgo biloba (5)            | Dietz et al. <sup>23</sup>                                             | 1 |                                                                                                                                                                                                                                                                                                                                                                                                                     |
|                                               | Social media use (1)                                                              | Adapted from Stark et al. <sup>24</sup>                                | 6 |                                                                                                                                                                                                                                                                                                                                                                                                                     |
|                                               | Fruit and Vegetable<br>Consumption (2)                                            | European Commission,<br>2013 <sup>25</sup> ; Fehr et al. <sup>26</sup> | 4 |                                                                                                                                                                                                                                                                                                                                                                                                                     |

**Supplementary table 1.** List of independent variables differentiated in the five category groups.

‘Count’ means the count of variables if 2 or more variables of the same scale are listed together.

## References

1. Gierk, B. *et al.* The somatic symptom scale-8 (SSS-8): a brief measure of somatic symptom burden. *JAMA internal medicine* **174**, 399–407; 10.1001/jamainternmed.2013.12179 (2014).
2. Kroenke, K., Spitzer, R. L. & Williams, J. B. The PHQ-9: validity of a brief depression severity measure. *Journal of general internal medicine* **16**, 606–613; 10.1046/j.1525-1497.2001.016009606.x (2001).
3. Döring, N., & Bortz, J. Psychometrische Einsamkeitsforschung: Deutsche Neukonstruktion der UCLA Loneliness Scale [Psychometric research on loneliness: A new German version of the University of California at Los Angeles (UCLA) Loneliness Scale]. *Diagnostica* **39**, 224–239 (1993).
4. Gumz, A., Erices, R., Brähler, E. & Zenger, M. Faktorstruktur und Gütekriterien der deutschen Übersetzung des Maslach-Burnout-Inventars für Studierende von Schaufeli *et al.* (MBI-SS). *Psychotherapie, Psychosomatik, medizinische Psychologie* **63**, 77–84; 10.1055/s-0032-1323695 (2013).
5. Wiltink, J. *et al.* Mini - social phobia inventory (mini-SPIN): psychometric properties and population based norms of the German version. *BMC psychiatry* **17**, 377; 10.1186/s12888-017-1545-2 (2017).
6. Töpitz, K. *et al.* *Wie gesund sind Studierende der Technischen Universität Kaiserslautern? Ergebnisse der Befragung 06/15* (Schriftenreihe des AB Public Health: Prävention und psychosoziale Gesundheitsforschung: Nr. 01/P16, Berlin: Freie Universität Berlin., 2016).
7. Dettmers, J. & Clauß, E. Arbeitsgestaltungskompetenzen für flexible und selbstgestaltete Arbeitsbedingungen. In *Gestaltungskompetenzen für gesundes Arbeiten*, edited by M. Janneck & A. Hoppe (Springer Berlin Heidelberg, Berlin, Heidelberg, 2018), pp. 13–25.
8. Gusy, B. & Lohmann, K. Berliner-Anforderungs Ressourcen Inventar für Studierende. In *Instrumentenhandbuch zum Projekt, University Health Report*, edited by B. Gusy & K. Lohmann (Schriftenreihe des Instituts für Prävention und psychosoziale Gesundheitsforschung (Nr 01/P14), Berlin: Freie Universität Berlin, 2014), pp. 31–40.
9. Fend, H. *Der Umgang mit der Schule in der Adoleszenz [Coping with school during adolescence]* (Huber, Bern, 1997).
10. Mohr, G., Rigotti, T. & Müller, A. Irritation - ein Instrument zur Erfassung psychischer Beanspruchung im Arbeitskontext. Skalen- und Itemparameter aus 15 Studien. *Zeitschrift für Arbeits- und Organisationspsychologie A&O* **49**, 44–48; 10.1026/0932-4089.49.1.44 (2005).
11. Rigotti, T., Schyns, B. & Mohr, G. A Short Version of the Occupational Self-Efficacy Scale: Structural and Construct Validity Across Five Countries. *Journal of Career Assessment* **16**, 238–255; 10.1177/1069072707305763 (2008).
12. Klingsieck, K. B. & Fries, S. Allgemeine Prokrastination. *Diagnostica* **58**, 182–193; 10.1026/0012-1924/a000060 (2012).
13. Krause, A. *et al.* Selbstgefährdung als Indikator für Mängel bei der Gestaltung mobil-flexibler Arbeit: Zur Entwicklung eines Erhebungsinstruments. *Wirtschaftspsychologie* (2015).
14. Daniels, K., Beesley, N., Cheyne, A. & Wimalasiri, V. Coping processes linking the demands-control-support model, affect and risky decisions at work. *Human Relations* **61**, 845–874; 10.1177/0018726708093543 (2008).
15. Rimann, M., & Udris, I. Subjektive Arbeitsanalyse: Der Fragebogen SALSA. In *Unternehmen arbeitspsychologisch bewerten. Ein Mehr-Ebenen-Ansatz unter besonderer Berücksichtigung von Mensch, Technik und Organisation*, edited by O. Strohm, & E. Ulich (vdf Hochschulverlag, Zürich, Switzerland, 1997), pp. 281–298.

16. Rudich, Z., Lerman, S. F., Gurevich, B., Weksler, N. & Shahar, G. Patients' self-criticism is a stronger predictor of physician's evaluation of prognosis than pain diagnosis or severity in chronic pain patients. *The journal of pain : official journal of the American Pain Society* **9**, 210–216; 10.1016/j.jpain.2007.10.013 (2008).
17. Tibubos, A. N. *et al.* Trait self-criticism in the general population: German normative data and psychometric properties of the Depressive Experiences Questionnaire Self-Criticism 4 (DEQ-SC4). *Journal of Personality Assessment* (2021, submitted).
18. Ryff, C. D. Happiness is everything, or is it? Explorations on the meaning of psychological well-being. *Journal of Personality and Social Psychology* **57**, 1069 (1989).
19. Ryff, C. D. & Keyes, C. L. The structure of psychological well-being revisited **69**, 719–727 (1995).
20. Abler, B. & Kessler, H. ERQ - Emotion Regulation Questionnaire - deutsche Fassung. In *Elektronisches Testarchiv*, edited by Leibniz-Zentrum für Psychologische Information und Dokumentation (ZPID) (ZPID, Trier, 2011).
21. Craig, C. L. *et al.* International physical activity questionnaire: 12-country reliability and validity. *Medicine and science in sports and exercise* **35**, 1381–1395; 10.1249/01.MSS.0000078924.61453.FB (2003).
22. Bush. The AUDIT Alcohol Consumption Questions (AUDIT-C): An Effective Brief Screening Test for Problem Drinking (1998).
23. Dietz, P., Soyka, M. & Franke, A. G. Pharmacological Neuroenhancement in the Field of Economics-Poll Results from an Online Survey. *Frontiers in psychology* **7**, 520; 10.3389/fpsyg.2016.00520 (2016).
24. Stark, B., Magin, M. & Jürgens, P. *Ganz meine Meinung? Informationsintermediäre und Meinungsbildung - eine Mehrmethodenstudie am Beispiel von Facebook* (Landesanstalt für Medien Nordrhein-Westfalen (LfM), Düsseldorf, 2017).
25. European Commission. *European Health Interview Survey (EHIS wave 2). Methodological manual : 2013 edition* (Publications Office of the European Union, Luxembourg, 2013).
26. Fehr, A., Lange, C., Fuchs, J., Neuhauser, H. & Schmitz, R. Gesundheitsmonitoring und Gesundheitsindikatoren in Europa. *Journal of Health Monitoring* **2**; 10.17886/RKI-GBE-2017-004.2 (2017).



**Association with the 12-month prevalence of PN**

|                                                      | $\chi^2$      | <i>p</i> |
|------------------------------------------------------|---------------|----------|
| Gender ( <i>n</i> = 3,800)                           | (2) = 18.802  | ≤ .001   |
| Degree ( <i>n</i> = 3,800)                           | (7) = 25.169  | .001     |
| Relationship status ( <i>n</i> = 3,796)              | (2) = 3.325   | .190     |
| Employment ( <i>n</i> = 3,800)                       | (3) = 8.260   | .041     |
| Support by parents/relatives ( <i>n</i> = 3,785)     | (1) = .675    | .411     |
| Parent's educational background ( <i>n</i> = 3,798)  | (8) = 9.735   | .284     |
| Migration background ( <i>n</i> = 3,799)             | (3) = 10.276  | .016     |
| Personal migration experience ( <i>n</i> = 3,799)    | (3) = 6.484   | .090     |
| Field of study ( <i>n</i> = 3,791)                   | (6) = 10.337  | .111     |
| First year ( <i>n</i> = 3,700)                       | (1) = 2.284   | .131     |
| Healthy diet ( <i>n</i> = 3,800)                     | (4) = 22.792  | ≤ .001   |
| Alcohol use (AUDIT-C Cut-off: 4) ( <i>n</i> = 3,796) | (1) = 73.920  | ≤ .001   |
| Smoking cigarettes ( <i>n</i> = 3,800)               | (4) = 262.566 | ≤ .001   |
| Coffee ( <i>n</i> = 3,800)                           | (3) = 79.112  | ≤ .001   |
| Energy drinks ( <i>n</i> = 3,800)                    | (3) = 99.658  | ≤ .001   |
| Caffeine tablets ( <i>n</i> = 3,800)                 | (3) = 151.702 | ≤ .001   |
| Cola ( <i>n</i> = 3,800)                             | (3) = 80.497  | ≤ .001   |
| Ginkgo biloba ( <i>n</i> = 3,799)                    | (3) = 40.141  | ≤ .001   |

**Supplementary table 3.** Relationship to the 12-month prevalence of pharmacological neuroenhancement of all selected categorial study variables.  $\chi^2$ : Pearson Chi-square value



12-month use of PN

|                                             |         | Step 1: sociodemographic variables ( $R^2 = 0.01^{***}$ ) | Step 2: psychological variables ( $R^2 = 0.071^{***}$ ) | Step 3: study-related psychosocial variables ( $R^2 = 0.092^{***}$ ) | Step 4: general psychosocial variables ( $R^2 = 0.1^{***}$ ) | Step 5: health-behavioral variables ( $R^2 = 0.257^{***}$ ) |
|---------------------------------------------|---------|-----------------------------------------------------------|---------------------------------------------------------|----------------------------------------------------------------------|--------------------------------------------------------------|-------------------------------------------------------------|
|                                             |         | OR (95% CI)                                               | OR (95% CI)                                             | OR (95% CI)                                                          | OR (95% CI)                                                  | OR (95% CI)                                                 |
| <b>Sociodemographic variables</b>           |         |                                                           |                                                         |                                                                      |                                                              |                                                             |
| Gender                                      | Female  | Reference <sup>***</sup>                                  | Reference <sup>***</sup>                                | Reference <sup>***</sup>                                             | Reference                                                    | Reference                                                   |
|                                             | Male    | 1.517 (1.214 – 1.897) <sup>***</sup>                      | 1.764 (1.414 – 2.277) <sup>***</sup>                    | 1.695 (1.328 – 2.163) <sup>***</sup>                                 | 1.768 (1.380 – 2.265) <sup>***</sup>                         | 1.387 (1.052 – 1.827) <sup>*</sup>                          |
|                                             | Diverse | 3.190 (1.342 – 7.580) <sup>**</sup>                       | 2.183 (0.877 – 5.431)                                   | 2.296 (0.919 – 5.736)                                                | 2.128 (0.842 – 5.377)                                        | 1.780 (0.638 – 4.971)                                       |
| <b>Psychological variables</b>              |         |                                                           |                                                         |                                                                      |                                                              |                                                             |
| Somatic symptoms                            |         |                                                           | 1.019 (0.991 – 1.048)                                   | 1.013 (0.985 – 1.042)                                                | 1.011 (0.983 – 1.040)                                        | 0.993 (0.962 – 1.024)                                       |
| Depressive symptoms                         |         |                                                           | 1.102 (1.067 – 1.139) <sup>***</sup>                    | 1.091 (1.054 – 1.130) <sup>***</sup>                                 | 1.095 (1.056 – 1.135) <sup>***</sup>                         | 1.086 (1.044 – 1.129) <sup>***</sup>                        |
| General anxiety                             |         |                                                           | 0.987 (0.902 – 1.079)                                   | 1.009 (0.920 – 1.107)                                                | 1.021 (0.930 – 1.120)                                        | 1.025 (0.926 – 1.134)                                       |
| Loneliness                                  |         |                                                           | 0.968 (0.924 – 1.013)                                   | 0.954 (0.910 – 1.000) <sup>*</sup>                                   | 0.965 (0.920 – 1.013)                                        | 0.999 (0.948 – 1.052)                                       |
| Emotional exhaustion                        |         |                                                           | 1.031 (0.940 – 1.132)                                   | 0.962 (0.854 – 1.084)                                                | 0.961 (0.853 – 1.083)                                        | 0.966 (0.849 – 1.101)                                       |
| <b>Study-related psychosocial variables</b> |         |                                                           |                                                         |                                                                      |                                                              |                                                             |
| Presenteeism                                |         |                                                           |                                                         | 1.005 (0.996 – 1.014)                                                | 1.006 (0.997 – 1.014)                                        | 1.005 (0.996 – 1.015)                                       |
| Absenteeism                                 |         |                                                           |                                                         | 1.019 (1.004 – 1.035) <sup>*</sup>                                   | 1.019 (1.003 – 1.034) <sup>*</sup>                           | 1.022 (1.005 – 1.040) <sup>**</sup>                         |
| Planning competency                         |         |                                                           |                                                         | 0.896 (0.728 – 1.104)                                                | 0.898 (0.729 – 1.107)                                        | 0.894 (0.712 – 1.122)                                       |
| Excessive demands                           |         |                                                           |                                                         | 1.103 (0.979 – 1.244)                                                | 1.082 (0.959 – 1.222)                                        | 1.106 (0.969 – 1.263)                                       |

|                                               |                                            |                         |                          |                          |
|-----------------------------------------------|--------------------------------------------|-------------------------|--------------------------|--------------------------|
| Competition                                   |                                            | 1.084 (0.914 – 1.287)   | 1.072 (0.902 – 1.275)    | 0.962 (0.796 – 1.262)    |
| Cognitive irritation                          |                                            | 1.057 (0.966 – 1.156)   | 1.080 (0.985 – 1.183)    | 1.081 (0.980 – 1.192)    |
| Social support (fellow students)              |                                            | 0.853 (0.749 – 0.970)*  | 0.856 (0.752 – 0.975)*   | 0.830 (0.721 – 0.955)**  |
| Competence for self-motivation                |                                            | 1.023 (0.827 – 1.265)   | 1.005 (0.812 – 1.244)    | 0.999 (0.795 – 1.256)    |
| Self-efficacy expectancy                      |                                            | 1.304 (1.055 – 1.611)*  | 1.258 (1.010 – 1.567)*   | 1.230 (0.968 – 1.563)    |
| Procrastination                               |                                            | 1.031 (1.008 – 1.056)** | 1.028 (1.010 – 1.567)*   | 1.013 (0.987 – 1.039)    |
| <b>General psychosocial variables</b>         |                                            |                         |                          |                          |
| Self-criticism                                |                                            |                         | 0.975 (0.947 – 1.004)    | 0.955 (0.926 – 0.986)**  |
| Self-acceptance                               |                                            |                         | 1.004 (0.954 – 1.057)    | 0.980 (0.927 – 1.035)    |
| Impulsiveness                                 |                                            |                         | 1.096 (1.041 – 1.155)*** | 1.027 (0.971 – 1.087)    |
| <b>Health behavior variables</b>              |                                            |                         |                          |                          |
| Healthy diet                                  |                                            |                         |                          | 1.264 (1.117 – 1.431)*** |
| Moderate-vigorous physical activity (min/day) |                                            |                         |                          | 1.001 (1.000 – 1.002)*   |
| Alcohol use                                   |                                            |                         |                          | 1.612 (1.243 – 2.092)*** |
| Smoking cigarettes                            |                                            |                         |                          | 1.468 (1.349 – 1.597)*** |
| Coffee                                        | never ( <i>n</i> = 1284)                   |                         |                          | Reference                |
|                                               | within the last 30 days ( <i>n</i> = 1766) |                         |                          | 1.531 (1.114 – 2.106)**  |

|                  |                                                |                          |
|------------------|------------------------------------------------|--------------------------|
|                  | within the last 12 months<br>( <i>n</i> = 387) | 1.135 (0.719 – 1.793)    |
|                  | more than 12 months ago<br>( <i>n</i> = 147)   | 0.904 (0.425 – 1.926)    |
| Energy drinks    | never ( <i>n</i> = 2354)                       | Reference                |
|                  | within the last 30 days<br>( <i>n</i> = 553)   | 1.166 (0.844 – 1.612)    |
|                  | within the last 12 months<br>( <i>n</i> = 374) | 1.328 (0.932 – 1.891)    |
|                  | more than 12 months ago<br>( <i>n</i> = 303)   | 0.864 (0.557 – 1.340)    |
| Caffeine tablets | never ( <i>n</i> = 3222)                       | Reference***             |
|                  | within the last 30 days<br>( <i>n</i> = 91)    | 4.235 (2.552 – 7.027)*** |
|                  | within the last 12 months<br>( <i>n</i> = 85)  | 1.763 (1.011 – 3.073)*   |
|                  | more than 12 months ago<br>( <i>n</i> = 186)   | 2.117 (1.416 – 3.164)*** |
| Coke             | never ( <i>n</i> = 1889)                       | Reference***             |
|                  | within the last 30 days<br>( <i>n</i> = 1106)  | 1.669 (1.255 – 2.221)*** |
|                  | within the last 12 months<br>( <i>n</i> = 453) | 2.267 (1.587 – 3.239)*** |
|                  | more than 12 months ago<br>( <i>n</i> = 136)   | 1.256 (0.625 – 2.524)    |
| Ginkgo biloba    | never ( <i>n</i> = 3451)                       | Reference                |
|                  | within the last 30 days<br>( <i>n</i> = 37)    | 2.587 (1.164 – 5.747)*   |
|                  | within the last 12 months<br>( <i>n</i> = 32)  | 1.095 (0.442 – 2.711)    |

more than 12 months ago  
(*n* = 64)

1.417 (0.697 – 2.881)

Social media use

0.997 (0.913 – 1.088)

---

**Supplementary table 4.** Binary logistic regression analysis to predict the dependent variable ‘12-month prevalence of pharmacological neuroenhancement’ by stepwise inclusion of the 5 independent variable groups. Observed cases: *n* = 3,608; \*\*\*: *p* ≤ .001; \*\*: *p* ≤ .01; \*: *p* ≤ .05; Step 1:  $\chi^2$  (2) = 17.504; Step 2:  $\chi^2$  (7) = 129.270; Step 3:  $\chi^2$  (17) = 167.444; Step 4:  $\chi^2$  (20) = 183.304; Step 5:  $\chi^2$  (40) = 490.590

12-month use of PN

Step 5: health-behavioral variables ( $R^2 = 0.254^{***}$ )

OR (95% CI)

**Sociodemographic variables**

|        |         |                         |
|--------|---------|-------------------------|
| Gender | Female  | Reference               |
|        | Male    | 1.451 (1.064 – 1.979)** |
|        | Diverse | 2.910 (0.997 – 8.494)   |

**Psychological variables**

|                      |                          |
|----------------------|--------------------------|
| Somatic symptoms     | 1.005 (0.971 – 1.041)    |
| Depressive symptoms  | 1.075 (1.029 – 1.122)*** |
| General anxiety      | 1.016 (0.907 – 1.139)    |
| Loneliness           | 1.009 (0.951 – 1.071)    |
| Emotional exhaustion | 0.960 (0.830 – 1.111)    |

**Study-related psychosocial variables**

|                                  |                         |
|----------------------------------|-------------------------|
| Presenteeism                     | 1.005 (0.995 – 1.016)   |
| Absenteeism                      | 1.026 (1.007 – 1.045)** |
| Planning competency              | 0.868 (0.672 – 1.121)   |
| Excessive demands                | 1.089 (0.938 – 1.266)   |
| Competition                      | 1.049 (0.848 – 1.297)   |
| Cognitive irritation             | 1.056 (0.946 – 1.179)   |
| Social support (fellow students) | 0.900 (0.768 – 1.055)   |
| Competence for self-motivation   | 1.015 (0.784 – 1.315)   |
| Self-efficacy expectancy         | 1.180 (0.898 – 1.551)   |
| Procrastination                  | 1.008 (0.979 – 1.037)   |

**General psychosocial variables**

|                 |                       |
|-----------------|-----------------------|
| Self-criticism  | 0.966 (0.932 – 1.001) |
| Self-acceptance | 0.978 (0.919 – 1.040) |

|                                               |                                                |                          |
|-----------------------------------------------|------------------------------------------------|--------------------------|
| Impulsiveness                                 |                                                | 1.045 (0.980 – 1.114)    |
| <b>Health behavior variables</b>              |                                                |                          |
| Healthy diet                                  |                                                | 1.219 (1.061 – 1.400)**  |
| Moderate-vigorous physical activity (min/day) |                                                | 1.001 (1.000 – 1.003)*   |
| Alcohol use                                   |                                                | 1.463 (1.094 – 1.995)**  |
| Smoking cigarettes                            |                                                | 1.502 (1.366 – 1.651)*** |
| Coffee                                        | never ( <i>n</i> = 1284)                       | Reference                |
|                                               | within the last 30 days<br>( <i>n</i> = 1766)  | 1.463 (1.017 – 2.103)*   |
|                                               | within the last 12 months<br>( <i>n</i> = 387) | 1.107 (0.659 – 1.860)    |
|                                               | more than 12 months ago ( <i>n</i> = 147)      | 0.867 (0.366 – 2.053)    |
| Energy drinks                                 | never ( <i>n</i> = 2354)                       | Reference                |
|                                               | within the last 30 days<br>( <i>n</i> = 553)   | 1.101 (0.760 – 1.595)    |
|                                               | within the last 12 months<br>( <i>n</i> = 374) | 1.370 (0.920 – 2.041)    |
|                                               | more than 12 months ago<br>( <i>n</i> = 303)   | 0.915 (0.557 – 1.500)    |
| Caffeine tablets                              | never ( <i>n</i> = 3222)                       | Reference***             |
|                                               | within the last 30 days<br>( <i>n</i> = 91)    | 3.934 (2.245 – 6.891)*** |
|                                               | within the last 12 months<br>( <i>n</i> = 85)  | 1.214 (0.620 – 2.375)    |
|                                               | more than 12 months ago<br>( <i>n</i> = 186)   | 2.365 (1.527 – 3.663)*** |
| Coke                                          | never ( <i>n</i> = 1889)                       | Reference***             |
|                                               | within the last 30 days<br>( <i>n</i> = 1106)  | 1.774 (1.282 – 2.455)*** |
|                                               | within the last 12 months<br>( <i>n</i> = 453) | 2.477 (1.654 – 3.710)*** |
|                                               | more than 12 months ago<br>( <i>n</i> = 136)   | 1.064 (0.471 – 2.401)    |
| Ginkgo biloba                                 | never ( <i>n</i> = 3451)                       | Reference                |
|                                               | within the last 30 days<br>( <i>n</i> = 37)    | 2.462 (1.058 – 5.733)*   |
|                                               | within the last 12 months<br>( <i>n</i> = 32)  | 0.869 (0.316 – 2.540)    |
|                                               | more than 12 months ago<br>( <i>n</i> = 64)    | 1.286 (0.579 – 2.857)    |
| Social media use                              |                                                | 0.967 (0.877 – 1.067)    |

**Supplementary table 5.** Cross-validation of the binary logistic regression analysis to predict the dependent variable '12-month prevalence of pharmacological neuroenhancement' using an 80% random sample. Observed cases:  $n = 2,889$ ; \*\*\*:  $p \leq .001$ ; \*\*:  $p \leq .01$ ; \*:  $p \leq .05$ ; Step 5:  $\chi^2 (40) = 385.123$ ; correctly classified cases: 89.6%

|                                                                | <b>Past 12 months use of PN</b>    |                                    |
|----------------------------------------------------------------|------------------------------------|------------------------------------|
|                                                                | <b>No</b>                          | <b>Yes</b>                         |
| <b>Predictors</b>                                              |                                    |                                    |
| Gender – male                                                  | 81.4% ( <i>n</i> = 903)            | 13.2% ( <i>n</i> = 146)            |
| Reference: female                                              | 86.5% ( <i>n</i> = 2458)           | 9.3% ( <i>n</i> = 263)             |
| Depressive symptoms (score: 0 – 27), mean ± SD                 | 7.0 ± 4.9<br>( <i>n</i> = 3380)    | 9.9 ± 5.8<br>( <i>n</i> = 416)     |
| Absenteeism (number in days), mean ± SD                        | 1.7 ± 4.5<br>( <i>n</i> = 3314)    | 3.4 ± 9.0<br>( <i>n</i> = 403)     |
| Social support by fellow students, mean ± SD<br>(score: 1 – 5) | 3.7 ± 0.9<br>( <i>n</i> = 3316)    | 3.5 ± 1.0<br>( <i>n</i> = 404)     |
| Self-criticism, mean ± SD (score: 7 – 28)                      | 18.6 ± 4.7<br>( <i>n</i> = 3305)   | 19.4 ± 5.1<br>( <i>n</i> = 398)    |
| Healthy diet, mean ± SD (score: 1 – 5)                         | 3.3 ± 1.0<br>( <i>n</i> = 3384)    | 3.4 ± 1.1<br>( <i>n</i> = 416)     |
| Moderate-vigorous physical activity (min/day),<br>mean ± SD    | 122.9 ± 98.8<br>( <i>n</i> = 3333) | 145.7 ± 119.2<br>( <i>n</i> = 408) |
| Risky alcohol use ( <i>n</i> = 1634)                           | 40.6% ( <i>n</i> = 1373 of 3380)   | 62.7% ( <i>n</i> = 261 of 416)     |
| Smoking cigarettes currently ( <i>n</i> = 542)                 | 11.5% ( <i>n</i> = 388 of 3384)    | 37.0% ( <i>n</i> = 154 of 416)     |
| <b>Soft neuroenhancers:</b>                                    |                                    |                                    |
| Coffee – never (reference)                                     | 94.5% ( <i>n</i> = 1,288)          | 5.5% ( <i>n</i> = 75)              |
| Coffee – within the last 30 days                               | 84.8% ( <i>n</i> = 1,590)          | 15.2% ( <i>n</i> = 284)            |
| Caffeine tablets – never (reference)                           | 91.1% ( <i>n</i> = 3,105)          | 8.9% ( <i>n</i> = 304)             |
| Caffeine tablets – within the last 30 days                     | 63.0% ( <i>n</i> = 63)             | 37.0% ( <i>n</i> = 37)             |
| Caffeine tablets – more than 12 month ago                      | 76.0% ( <i>n</i> = 152)            | 24.0% ( <i>n</i> = 48)             |
| Coke – never (reference)                                       | 93.2% ( <i>n</i> = 1,867)          | 6.8% ( <i>n</i> = 137)             |
| Coke – within the last 30 days                                 | 84.1% ( <i>n</i> = 990)            | 15.9% ( <i>n</i> = 187)            |
| Coke – within the last 12 month                                | 83.4% ( <i>n</i> = 396)            | 16.6% ( <i>n</i> = 79)             |
| Ginkgo biloba – never (reference)                              | 89.7% ( <i>n</i> = 3,279)          | 10.3% ( <i>n</i> = 378)            |
| Ginkgo biloba – within the last 30 days                        | 64.1% ( <i>n</i> = 25)             | 35.9% ( <i>n</i> = 14)             |

**Supplementary table 6.** Descriptive statistics of the predictors of PN among survey participants (*n* = 3,984). SD: standard deviation
